# Supplementary material
Source: PubMed Central journal article supplement (PMC3209365)

Supplementary Figure 1. Phylogenetic analysis of alphacoronaviruses, betacoronaviruses, gammacoronaviruses and putative deltacoronaviruses. All avian viral sequences deduced in this study were included in the analysis. Gammacoronaviruses detected in *Galloanserae* and deltacoronaviruses detected in *Neoves* are highlighted in blue and green, respectively. Gammacoronaviruses detected in *Neoves* and deltacoronaviruses detected in *Galloanserae* are all highlighted in red. \*The dropping sample might derive from a hybrid between *Anas* spp. or an American wigeon of captive origin.

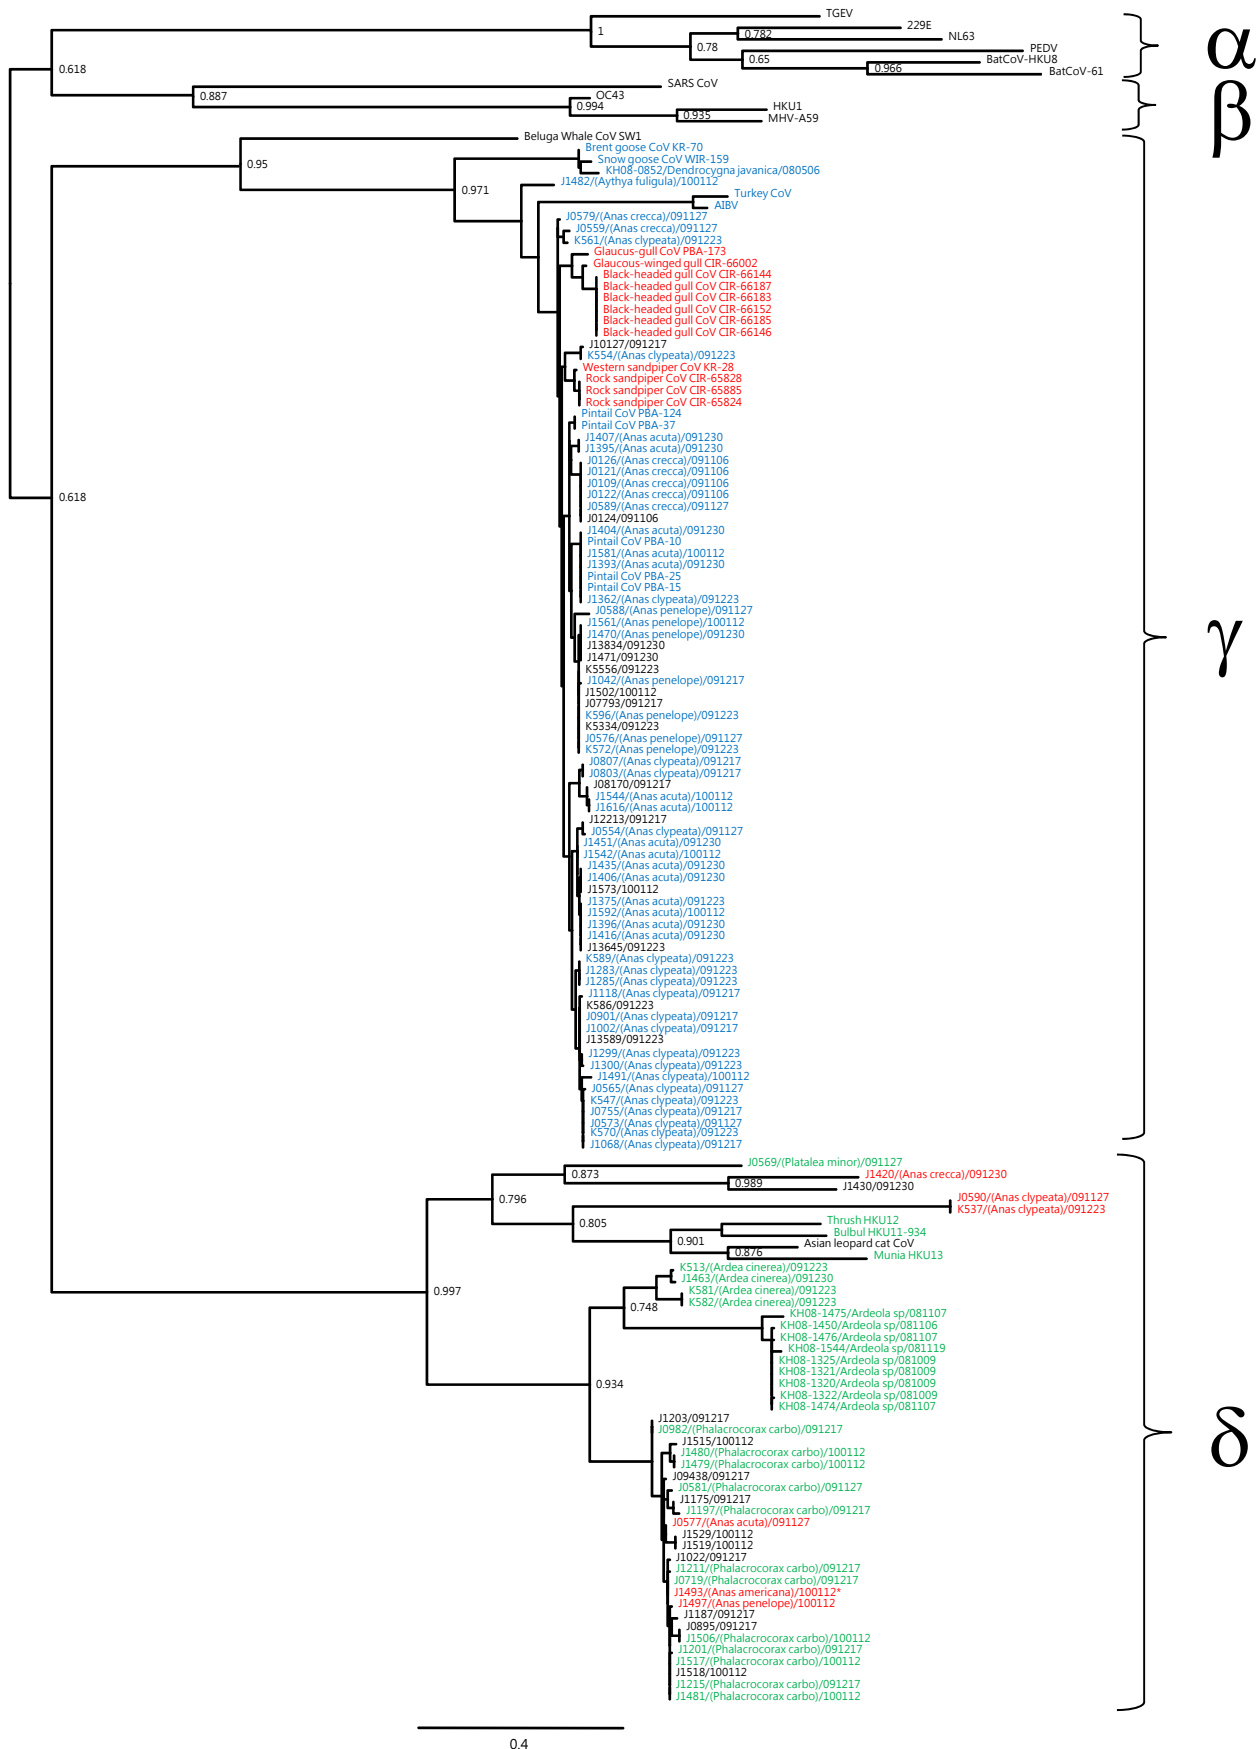

Supplement: supp_85.23.12815_FigS1.pdf [file supp_85.23.12815_FigS1.pdf]
